# Supplementary material for: Phage Anti-Pycsar Proteins Efficiently Degrade β-Lactam Antibiotics
Source: Preprints.org preprint supplement (doi:10.20944/preprints202407.0921.v1), 2024-07-11
Supplement: Supplementary file 1 [file supplementary]

Supplementary Information

Phage Anti-Pycsar Proteins Efficiently Degrade β-Lactam Antibiotics

Pallav Joshi1,2†, Stefan Krco1,2†, Samuel J. Davis,1,2, Lachlan Asser1, Thomas Brück4, Rochelle M. Soo1,2, Mikael Boden1, Philip Hugenholtz1,2, Liam A. Wilson3, Gerhard Schenk1,5* and Marc T. Morris1,2*

1 School of Chemistry and Molecular Biosciences, The University of Queensland, Brisbane, Australia.

2 Australian Centre for Ecogenomics, The University of Queensland, Brisbane, Australia.

3 Chemistry Research Laboratory, Department of Chemistry and the Ineos Oxford Institute for Antimicrobial Research, Oxford University, Oxford, OX1 3TA United Kingdom.

4 Werner Siemens-Chair of Synthetic Biotechnology, Technical University of Munich (TUM), TUM School of Natural Sciences, Lichtenbergstr. 4, 85748 Garching, Germany.

5 Australian Institute of Bioengineering and Nanotechnology, The University of Queensland, Brisbane, Australia.

* Correspondence: MTM – marc.morris@uq.edu.au; GS schenk@uq.edu.au

† These authors contributed equally to this work and share first authorship

**
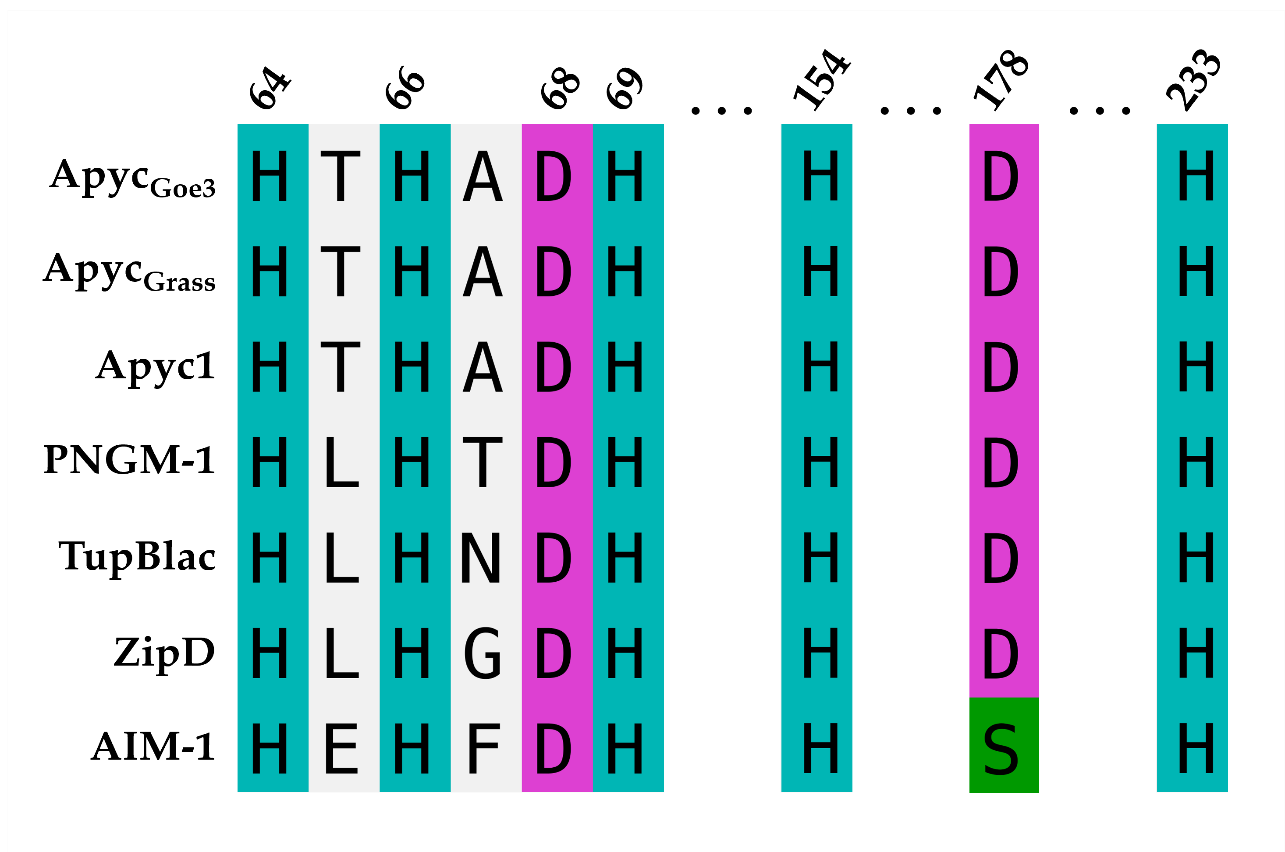
**

**Figure S1.** Aligned metal-binding residues of Apyc orthologs and representatives of the MBL-fold superfamily. Amino acid sequences from various functional subgroups of the MBL-fold superfamily were aligned using structure-guided sequence alignment with MAFFT-DASH (L-INS-i) [55,56]. Columns corresponding to residues comprising the α (H64, H66, H154) and β (D68, H69, H233) metal-binding sites, and the metal-bridging position (178) were extracted for representative sequences. ApycGoe3 and ApycGrass display the same metal binding motifs as Apyc1 and much of the broader superfamily, and possess the bridging aspartate residue absent in true metallo-β-lactamases (*i.e.*, the B1, B2, and B3 MBLs).

**Table S1**: Catalytic parameters of representative members of each Ambler class of β-lactamases. Classes A, C, and D are SBLs, while Class B (inclusive of the B1, B2, and B3 subgroups) are MBLs. Units of kcat, KM, and kcat/KM are s-1, μM, and s-1 mM-1. aYong *et al.* [37], bBottoni *et al.* [57], cHorsfall *et al.* [58], dSegatore *et al.* [59], e Bebrone *et al.* [60], f Venkatachalam *et al.* [61], gDe Wals *et al*. [62], hPoirel *et al.* [63], iRobin *et al.* [64], jMarcoccia *et al.* [65], h Chiou *et al*. [66], i Mammeri *et al.* [67], j Mazzariol *et al.* [68], k Lenfant *et al.* [69]. N.H. - no hydrolytic activity detected. | N.D. – not determined.

|  | **TEM-1**  **(Class A)** | | | **NDM-1a**  **(Class B1)** | | | **CphA**  **(Class B2)** | | | **AIM-1c**  **(Class B3)** | | | **AmpC (*E. coli K12*)**  **(Class C)** | | | **OXA-48**  **(Class D)** | | |
| --- | --- | --- | --- | --- | --- | --- | --- | --- | --- | --- | --- | --- | --- | --- | --- | --- | --- | --- |
| **Substrate** | **kcat** | **KM** | **kcat/KM** | **kcat** | **KM** | **kcat/KM** | **kcat** | **KM** | **kcat/KM** | **kcat** | **KM** | **kcat/KM** | **kcat** | **KM** | **kcat/KM** | **kcat** | **KM** | **kcat/KM** |
| **Penicillins** | | | | | | | | | | | | | | | | | | |
| Penicillin G | 1660g | 62g | 26,774g | 11 | 16 | 680 | 3d/  0.03e | 630d/  870e | 4.8d/  0.034e | 778 | 31 | 25,000 | 45 | 4.4 | 10,227 | 245h | 40h | 6’100h |
| Ampicillin | 1450f | 71f | 20,422f | 15 | 22 | 660 | <0.01e | 2’500e | <0.004 | 594 | 41 | 14,000 | 4.2 | 3.5 | 1,200 | 340h | 5’200h | 65h |
| Carbenicillin | 120k | 14k | 8,571k | 108j | 285j | 379j | 10d | 500d | 20d | - | - | - | 0.002j | 0.1j | 20j | 311k | 57k | 5’456k |
| **Carbapenems** | | | | | | | | | | | | | | | | | | |
| Meropenem | N.H. | N.H. | N.H. | 12 | 49 | 250 | 3,100b/  53d | 1,600b/  250d | 1,940b/  212d | 1’000 | 163 | 6,100 | - | - | - | 0.1h | 200h | 0.5h |
| Imipenem | N.H. | N.H. | N.H. | 20 | 95 | 210 | 460b/  140d/  1,200e | 110b/  86d/  340e | 4,180b/  1,627d/  3,529e | 1’700 | 97 | 18,000 | 0.09i | 32’000i | 0.0028i | 2h | 14h | 145h |
| **Cephalosporins** | | | | | | | | | | | | | | | | | | |
| Cephalothin | 77g | 180g | 427g | 4 | 10 | 400 | - | - | - | 529 | 38 | 14,000 | 300 | 42 | 7,142 | 3h | 120h | 150h |
| Cefuroxime | <0.1i | N.Di | N.Di | 5 | 8 | 610 | - | - | - | 292 | 29 | 10,000 | 0.15j | 0.15j | 1,000j | - | - | - |
